# Supplementary material
Source: PubMed Central journal article supplement (PMC3566996)
Supplement: chest_143_2_429_ds01.pdf [file chest_143_2_429_ds01.pdf]

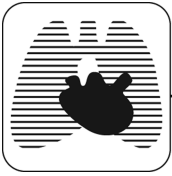

### Use of New Treatment Modalities for Non-small Cell Lung Cancer Care in the Medicare Population

Michael T. Vest, DO, FCCP; Jeph Herrin, PhD; Pamela R. Soulos, MPH; Roy H. Decker, PhD, MD; Lynn Tanoue, MD, FCCP; Gaetane Michaud, MD, FCCP; Anthony W. Kim, MD, FCCP; Frank Detterbeck, MD, FCCP; Daniel Morgensztern, MD; and Cary P. Gross, MD

#### e-Appendix 1. International Classification of Diseases for Oncology, Third Edition Codes for Histologic Classification

|                              |                                                      |
|------------------------------|------------------------------------------------------|
| Adenocarcinoma               | 8140-7, 8255, 8260, 8310, 8480-1, 8490, 8560, 8570-1 |
| Bronchioloalveolar carcinoma | 8250-4                                               |
| Squamous Cell Carcinoma      | 8070-8, 8050-2                                       |
| Large Cell                   | 8012-3, 8022, 8033                                   |
| Other/Undifferentiated       | All other codes associated with lung primary         |

#### e-Appendix 2. Procedure and diagnosis codes used in analysis

|                                                           |                                                                                                                | International Classification of Diseases (9 <sup>th</sup> revision) |           |
|-----------------------------------------------------------|----------------------------------------------------------------------------------------------------------------|---------------------------------------------------------------------|-----------|
|                                                           |                                                                                                                | Procedure                                                           | Diagnosis |
|                                                           | Healthcare Common Procedure Coding System                                                                      |                                                                     |           |
| Invasive Staging                                          | 31620, 31629, 31633, 32605, 32606, 39000, 39010, 39400, 43231, 43242, 43259, 76975, 43232                      |                                                                     |           |
| Surgical Resection – Open                                 | 32440, 32442, 32445, 32480, 32482, 32484, 32486, 32488, 32500, 32503, 32520, 32522, 32525                      | 32.29, 32.3, 32.39, 32.4, 32.49, 32.5, 32.50                        |           |
| Surgical Resection – video assisted thoracoscopic surgery | 32657, 32663                                                                                                   | 32.20, 32.30, 32.41, 32.59                                          |           |
| External beam radiation therapy                           | 77402, 77403, 77404, 77406, 77407, 77408, 77409, 77411, 77412, 77413, 77414, 77416'                            |                                                                     |           |
| Intensity modulated radiation therapy                     | 77301, 77418, 0073T, G0174                                                                                     |                                                                     |           |
| Stereotactic body radiation therapy                       | G0173, G0243, G0251, G0339, G0340, 0082T, 77371, 77372, 77373                                                  |                                                                     |           |
| Proton therapy                                            | 77520-77525                                                                                                    |                                                                     |           |
| Chemotherapy                                              | 96400-96549, Q0083-Q0085, J9000-J9999, J8510, J8520, J8521, J8530, J8560, J8565, J8600, J8610, J8700' G0355-62 | 99.25x                                                              | V58.1     |

Online supplements are not copyedited prior to posting.
